Ecological factors rather than physical barriers to dispersal shape genetic structure of algal symbionts in horizontally-transmitting corals

Davies SW<sup>1,2\*</sup>, Wham D<sup>3</sup>, Kanke MR<sup>1,4</sup> and MV Matz<sup>1</sup>

<sup>1</sup> The University of Texas at Austin, Department of Integrative Biology, Austin, TX

<sup>2</sup> The University of North Carolina at Chapel Hill, Department of Marine Sciences, Chapel Hill, NC

<sup>3</sup> Pennsylvania State University, Department of Biology, University Park, PA

<sup>4</sup> The University of North Carolina at Chapel Hill, Department of Genetics, Chapel Hill, NC

\* Corresponding author:

Sarah W. Davies, 512-609-9134. [daivessw@gmail.com](mailto:daivessw@gmail.com)

Department of Marine Sciences, 123 South Road, The University of North Carolina at Chapel Hill, Chapel Hill, NC 27599-3300

KEYWORDS: coral, symbiosis, *Symbiodinium*, clade C, population structure, divergence, dispersal, local adaptation, host-specificity, ecological partitioning, ecology

# **Abstract**

Many reef-building corals acquire their algal symbionts (*Symbiodinium* sp.) from the local environment upon recruitment. This horizontal transmission strategy where hosts pair with locally available symbionts could serve to increase coral fitness across diverse environments, as long as the host maintains high promiscuity and symbionts adapt locally. Here, we tested this hypothesis in two coral host species by comparing host and symbiont genetic structures across different spatial scales in Micronesia. Each host species associated with two genetically distinct *Symbiodinium* lineages, confirming high promiscuity in broadly dispersing hosts. However, contrary to our initial expectation, symbiont genetic structure was independent of physical barriers to dispersal between islands, unlike genetic structure of their hosts that was nearly perfectly explained by oceanic currents. Instead, *Symbiodinium* consistently demonstrated genetic divergence among local reefs and between the two host species at each island, although not necessarily between distant islands. These observations indicate that *Symbiodinium* disperse much more broadly than previously thought and continuously adapt to specific hosts and reef environments across their range, following the classical Baas Becking's hypothesis: "Everything is everywhere, but the environment selects". Overall, our findings confirm horizontal transmission could be a mechanism for broadly dispersing coral species to enhance their local fitness by associating with locally adapted symbionts. Dramatic differences in factors driving the genetic structures of horizontally-transmitting corals and their *Symbiodinium* imply that viewing their combined genomes as a single evolving entity ('hologenome') would be misleading.

# **Introduction**

Symbioses are ubiquitous in nature and the interactions between symbiotic partnerships have been implicated in eukaryote evolutionary diversification (1-4) and in the origin of eukaryotes (5). Many well-known symbioses involve the passing of symbionts from parents to offspring (vertical transmission), fully aligning the evolutionary trajectories of symbiotic partners and typically lead to their deep integration at biochemical and genomic levels (i.e. *Buchnera* in aphids (6, 7)). The result of this symbiosis is essentially a novel composite organism. In other types of symbioses, the association between partners must be newly established in every generation (horizontal transmission), which allows for the maintenance of each partner's species identity. In theory, this kind of relationship should generate novel ecological opportunities for both symbiotic partners through their mixing and matching across environments. For example, association with ecologically specialized algal photobionts can lead to distinct ecological guilds of lichens (8) or allow a fungal partner to expand its geographic range across a broader climatic envelope (9). Similarly, in aphids, association with various horizontally transmitted bacterial symbionts allows these insects to colonize novel host plants across climatic zones (10). Considering these and other examples of ecological adaptation based on varying symbiotic associations, it has been argued that the joint genomic content of symbiotic systems should be considered as a single unit of evolution, the 'hologenome' (11, 12). However, the usefulness of this concept depends on whether the evolutionary trajectories of both symbiotic partners are sufficiently aligned to present a unified target of selection (13). Here, we explore this question in the symbiosis between a horizontally transmitting reef-building coral and dinoflagellate algae of the genus *Symbiodinium* (14).

Association with *Symbiodinium* is obligatory for many coral hosts that rely on algal photosynthesis for energy, while the algae benefit from protected and light-exposed residence as well as inorganic nutrients and CO<sub>2</sub> concentration regulatory mechanisms provided by the host (15-18). Given the obligatory nature of this symbiosis for the host, it is somewhat surprising that in the majority of coral species (~85%) *Symbiodinium* are not transmitted vertically, but rather must be acquired by the juvenile coral from its local environment (19, 20). One possible explanation is that dispersal ranges of aposymbiotic coral larvae typically extend over hundreds of kilometers (i.e. 21), while the environmental variation corals must deal with exists on much smaller spatial scales: reef environments with varying light, thermal and nutrient conditions can be separated by meter-scale distances (i.e. 22). Under such circumstances, coral hosts would benefit from the mixing and matching strategy, improving their fitness by associating with the locally available, and putatively ecologically specialized, algal strains (23-25). Establishing the relative roles of these symbiotic partners in adaptation to variable environments is essential for better prediction of coral reefs' future under climate change (i.e. 26).

Although symbiont-free coral larvae show practically unrestricted flexibility in symbiont uptake (27-30), it nevertheless results in strong specificity of the resulting coral-*Symbiodinium* association: the majority of coral species are found hosting a single *Symbiodinium* subclade (26, 31-38). This specificity putatively arises from within-host competition between algal strains after initial uptake (32). Selection for a better match with the host is therefore expected to be another major evolutionary force affecting *Symbiodinium* populations (3), in addition to environmental specialization.

The third force that would influence the dynamics of coral-*Symbiodinium* symbiosis is dispersal. It is reasonable to hypothesize that local environmental specialization of the symbionts would be most easily achieved if the symbionts were dispersal-limited compared to the coral host. Baums *et al.*, (26) investigated within-subclade genetic variation of Caribbean *Symbiodinium* in the larger context of the genetics of the host (*Acropora palmata*) and determined that *Symbiodinium* exhibited stronger genetic structure than the coral host, suggesting limitation of symbiont dispersal relative to the host.

To integrate these three evolutionary forces, we formulated a working hypothesis for this study, the ‘global host, local symbiont’ hypothesis. It posits that (i) coral hosts disperse widely and are able to establish symbiosis with diverse algal strains across locations; (ii) *Symbiodinium* algae are poor dispersers, which results in strong divergence among locations aligning with physical barriers and facilitates their local environmental specialization; (iii) local *Symbiodinium* strains also diverge with respect to the host species as a result of selective pressure towards higher host specificity. To validate all three components of our hypothesis, we examined multi-locus genotypes (MLG) of clade C *Symbiodinium* in two species of *Acropora* – *A. hyacinthus* and *A. digitifera* – collected from the same reef locations across the Micronesian Pacific (Fig. 1). Our previous work has shown that both host species exhibit extensive genetic connectivity and their genetic structure is nearly perfectly explained by the patterns of regional surface currents (21). By using two coral species that co-occur across the same locations as well as local reef environments we aimed to disentangle the roles of environmental specialization, host specialization, and physical barriers to dispersal in driving the fine-scale genetic structure

of *Symbiodinium*.

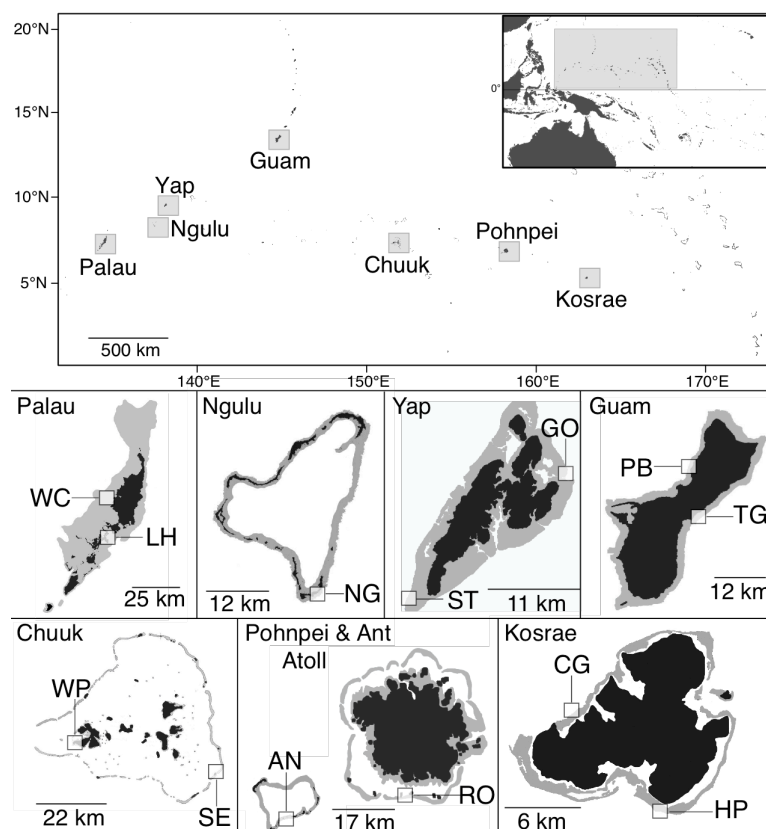

Figure 1: Geographic location of the Micronesian islands where *Acropora hyacinthus* and *A. digitifera* coral samples were collected. Top: Map of the Micronesian Pacific with an inset of the Pacific Ocean for reference. Islands where samples were collected and analyzed for *Symbiodinium* genetics are designated with grey boxes. Detailed information on each sampling site is located in Table 5. No *A. hyacinthus* were present in Guam and *A. digitifera* were not collected in Ngulu.

## Results

### Two *Symbiodinium* clade C lineages

To enable standard population genetic analysis, we restricted our study to only corals that hosted a single diploid *Symbiodinium* clone (i.e., yielded a unique diploid *Symbiodinium* genotype across six analyzed microsatellite loci), which encompassed the majority (69% *A. digitifera* and 64% *A. hyacinthus*) of our samples. Across the two coral species in Micronesia (Fig. 1), two distinct *Symbiodinium* lineages were observed, which were most

clearly discriminated by two of the six microsatellite loci (Fig. S1). Sequencing of the *psbA<sub>ncr</sub>* gene for a subset samples classified these lineages as C40 and C3 *sensu* Lajeunesse et al. (39) and LaJeunesse and Thornhill (40) (Fig. 2). Corals of both species from Palau and Ngulu hosted exclusively C40 *Symbiodinium* (Fig. 3A, pink bars). This lineage was also prevalent in *A. digitifera* at one reef site on Yap and was rarely found in *A. digitifera* across the rest of Micronesia. All other coral hosts of either species associated with *Symbiodinium* C3 (Fig. 3A, turquoise bars). Both *Symbiodinium* lineages possessed high genetic diversity, with a total of 70 unique alleles across six SSR loci observed in C40 across three islands (Table 1A) and 130 unique alleles across the same six SSR loci in C3 across five islands (Table 1B). Mean numbers of alleles per island for each locus for C40 ranged from 3.00-4.67 with the highest numbers of private alleles in Palau (N=7) (Table 1A). Mean allele numbers per island for each locus for C3 ranged from 3.83-5.17 and numbers of private alleles ranged from 1-4 (Table 1B).

Table 1. Summary of allelic diversity measures for *Symbiodinium* C40 (A) and *Symbiodinium* C3 (B). Na: number of alleles, He: expected heterozygosity, Ho: observed heterozygosity, PA: number of private alleles

A. *Symbiodinium* C40

|            | Na   | He   | Ho   | PA |
|------------|------|------|------|----|
| <b>PAL</b> | 4.67 | 0.52 | 0.64 | 7  |
| <b>NGU</b> | 4.00 | 0.42 | 0.55 | 6  |
| <b>YAP</b> | 3.00 | 0.43 | 0.51 | 2  |

B. *Symbiodinium* C3

|            | Na   | He   | Ho   | PA |
|------------|------|------|------|----|
| <b>YAP</b> | 4.33 | 0.47 | 0.56 | 1  |
| <b>GUA</b> | 3.83 | 0.42 | 0.46 | 3  |
| <b>CHU</b> | 5.17 | 0.58 | 0.51 | 3  |
| <b>POH</b> | 4.33 | 0.47 | 0.56 | 1  |
| <b>KOS</b> | 4.00 | 0.48 | 0.51 | 4  |

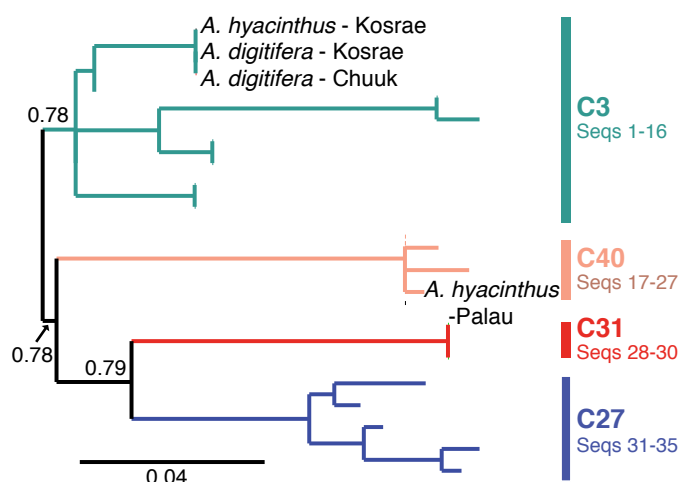

Figure 2. Phylogenetic analysis of  $psbA^{ncr}$  sequences from representative samples from this study (labeled branch tips) along with publically available  $psbA^{ncr}$  sequences from known *Symbiodinium* subclades identifies two lineages present (C3 and C40). Bootstrap support values are shown at the partitions that define known subclades. Scale bar: replacements per nucleotide site. Sequence accession numbers for reference sequences are given in Supplementary Table 1.

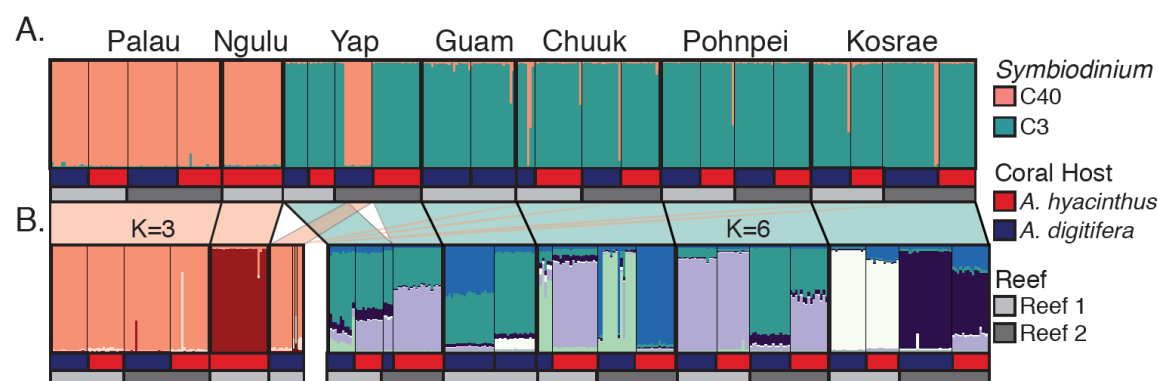

Figure 3: Analyses of microsatellite loci data for *Symbiodinium* hosted by *Acropora hyacinthus* and *Acropora digitifera* at thirteen sites across seven islands in Micronesia, using multilocus genotyping data. A. STRUCTURE population assignment for *Symbiodinium* from two *Acropora* host species across greater Micronesia at an optimal population number ( $K=2$ ), corresponding to C40 (pink) and C3 (turquoise) clade C subclades. Colors in the bottom panels correspond to host species and shades of grey correspond to different sites within each island. B. Within-subclade STRUCTURE analysis.

## *Symbiodinium* genetic structure

All pairwise between-islands  $F_{ST}$  for *Symbiodinium* C40 were significant (Table 2A).

*Symbiodinium* C3 had one non-significant  $F_{ST}$  (Yap-Pohnpei) while all others were



significant and ranged from 0.058 (Guam-Chuuk) to 0.078 (Yap-Kosrae) (Table 2B).  
Notably, *Symbiodinium* C3 differentiation did not show the isolation-by-distance pattern observed in both coral hosts (Fig. 4). The correlation of  $F_{ST}$  with distance could not be computed for *Symbiodinium* C40 due to few between-island comparisons available. For *Symbiodinium* C3  $F_{ST}$  values generally exceeded  $F_{ST}$  values for the host (Fig. 4A), however, this result did not imply stronger genetic differentiation in the symbionts: higher  $F_{ST}$  in the symbionts was a consequence of higher mean heterozygosity in *Symbiodinium* markers (e.g. (41). Indeed, an alternative measure of genetic differentiation controlling for mean heterozygosity - Jost's D (42) - demonstrated that *Symbiodinium* C3 genetic divergence was in fact intermediate between the two hosts (Fig. 4B).

Table 2. Summary of pairwise  $F_{ST}$  values between all islands for *Symbiodinium* C40 (A) and C3 (B). Permutations were run 9999 times. All significant comparisons are shaded in grey.

A. *Symbiodinium* C40

|     | PAL   | NGU   | YAP   |
|-----|-------|-------|-------|
| PAL | 0.000 | ***   | 0.004 |
| NGU | 0.279 | 0.000 | ***   |
| YAP | 0.056 | 0.326 | 0.000 |

B. *Symbiodinium* C3

|     | YAP   | GUA   | CHU   | POH   | KOS   |
|-----|-------|-------|-------|-------|-------|
| YAP | 0.000 | ***   | ***   | 0.059 | ***   |
| GUA | 0.062 | 0.000 | ***   | ***   | ***   |
| CHU | 0.066 | 0.058 | 0.000 | ***   | ***   |
| POH | 0.009 | 0.071 | 0.063 | 0.000 | ***   |
| KOS | 0.078 | 0.077 | 0.076 | 0.067 | 0.000 |

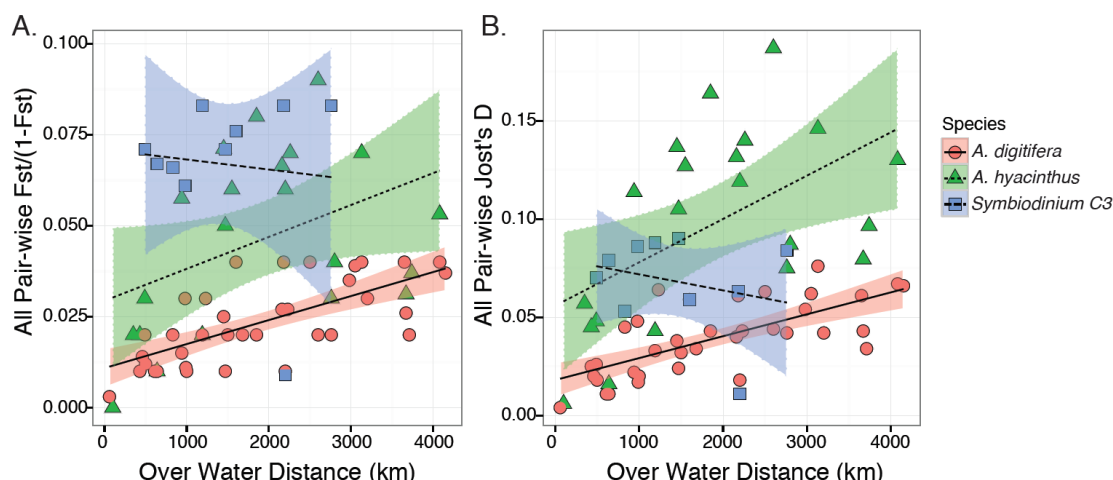

Figure 4: Comparison of two host species and *Symbiodinium C3* differentiation. A. Pairwise genetic differentiation [ $F_{ST}/(1-F_{ST})$ ] of two species of *Acropora* coral and *Symbiodinium C3* across linear distances (km) demonstrating significant isolation by distance for the two host species but no correlation for the symbiont. B. Pairwise Jost's D for the same two host species and *Symbiodinium C3* across linear distances (km) demonstrating no isolation by distance and no difference in overall divergence between the host and symbiont.

## Host specificity and environmental specialization

Discriminant analysis of principal components (DAPC) strongly differentiated between host species for both *Symbiodinium C40* and *C3* (Table 3, Fig. 5A, B), suggesting that host specificity is an effective driver of symbiont diversity. In addition, DAPC analysis also demonstrated consistent differences among islands for each *Symbiodinium* type irrespective of host species: strong per-island assignment proportions were observed for *C40* (Fig. 4C, 82-100%) and *C3* (Fig. 5D, 51-98%), consistent with both STRUCTURE (Fig. 3) and  $F_{ST}$  results (Table 1). Moreover, nearly all pairwise  $F_{ST}$  values between different reef sites at the same island were significant for both *Symbiodinium* lineages (Table 4), suggesting environmental partitioning of symbionts. In accord with these results, of the two top eigenvalues in DAPC analyses within individual islands, one explained *Symbiodinium* genetic divergence by host species (host specificity) and the other corresponded to differences between reef sites (environmental specialization) (Fig.

6).

Table 3: Discriminant analysis of principle component (DAPC) model information including the number of principle components (“PC”) and discriminant functions (“DF”) retained, the proportion of conserved variance by the clustering model (“var”), and the overall assignment proportions across the model (“assign”). A. DAPC information for *Symbiodinium* from different host species, B. islands, and C. sites and host species within each island.

Model Information

| A. Host Species         | PC | DF | var   | assign |
|-------------------------|----|----|-------|--------|
| <i>Symbiodinium</i> C40 | 7  | 1  | 0.814 | 0.879  |
| <i>Symbiodinium</i> C3  | 14 | 1  | 0.922 | 0.846  |
| B. Islands              | PC | DF | var   | assign |
| <i>Symbiodinium</i> C40 | 16 | 4  | 0.970 | 0.981  |
| <i>Symbiodinium</i> C3  | 19 | 4  | 0.966 | 0.796  |
| C. Within Island        | PC | DF | var   | assign |
| Palau C40               | 14 | 3  | 0.984 | 0.735  |
| Yap C3                  | 7  | 3  | 0.844 | 0.778  |
| Guam C3                 | 3  | 3  | 0.647 | 0.860  |
| Chuuk C3                | 12 | 3  | 0.933 | 0.927  |
| Pohnpei C3              | 8  | 3  | 0.906 | 0.900  |
| Kosrae C3               | 7  | 3  | 0.878 | 0.888  |

Table 4. Summary of pairwise  $F_{ST}$  values for *Symbiodinium* C40 (A) and C3 (B) between all sites pooled across host species. Permutations were run 9999 times. All significant comparisons are shaded in grey.

A. *Symbiodinium* C40

|      | PAL1  | PAL2  | NGU   | YAP2  |
|------|-------|-------|-------|-------|
| PAL1 | 0.000 | 0.009 | ***   | 0.007 |
| PAL2 | 0.031 | 0.000 | ***   | 0.007 |
| NGU  | 0.283 | 0.303 | 0.000 | ***   |
| YAP2 | 0.057 | 0.074 | 0.326 | 0.000 |

B. *Symbiodinium* C3

|      | YAP1  | YAP2  | GUA1  | GUA2  | CHU1  | CHU2  | POH1  | POH2  | KOS1  | KOS2  |
|------|-------|-------|-------|-------|-------|-------|-------|-------|-------|-------|
| YAP1 | 0.000 | 0.139 | 0.002 | 0.009 | ***   | ***   | 0.002 | 0.055 | ***   | ***   |
| YAP2 | 0.011 | 0.000 | ***   | 0.003 | ***   | ***   | 0.027 | 0.064 | ***   | ***   |
| GUA1 | 0.059 | 0.107 | 0.000 | 0.045 | ***   | ***   | ***   | ***   | ***   | ***   |
| GUA2 | 0.045 | 0.062 | 0.025 | 0.000 | 0.002 | ***   | ***   | 0.008 | ***   | ***   |
| CHU1 | 0.071 | 0.073 | 0.104 | 0.065 | 0.000 | ***   | ***   | ***   | ***   | ***   |
| CHU2 | 0.079 | 0.112 | 0.070 | 0.086 | 0.068 | 0.000 | ***   | ***   | ***   | ***   |
| POH1 | 0.053 | 0.028 | 0.126 | 0.111 | 0.085 | 0.126 | 0.000 | ***   | ***   | ***   |
| POH2 | 0.018 | 0.018 | 0.093 | 0.039 | 0.067 | 0.092 | 0.063 | 0.000 | ***   | ***   |
| KOS1 | 0.154 | 0.146 | 0.170 | 0.110 | 0.163 | 0.176 | 0.168 | 0.119 | 0.000 | ***   |
| KOS2 | 0.092 | 0.121 | 0.116 | 0.131 | 0.129 | 0.090 | 0.136 | 0.100 | 0.183 | 0.000 |

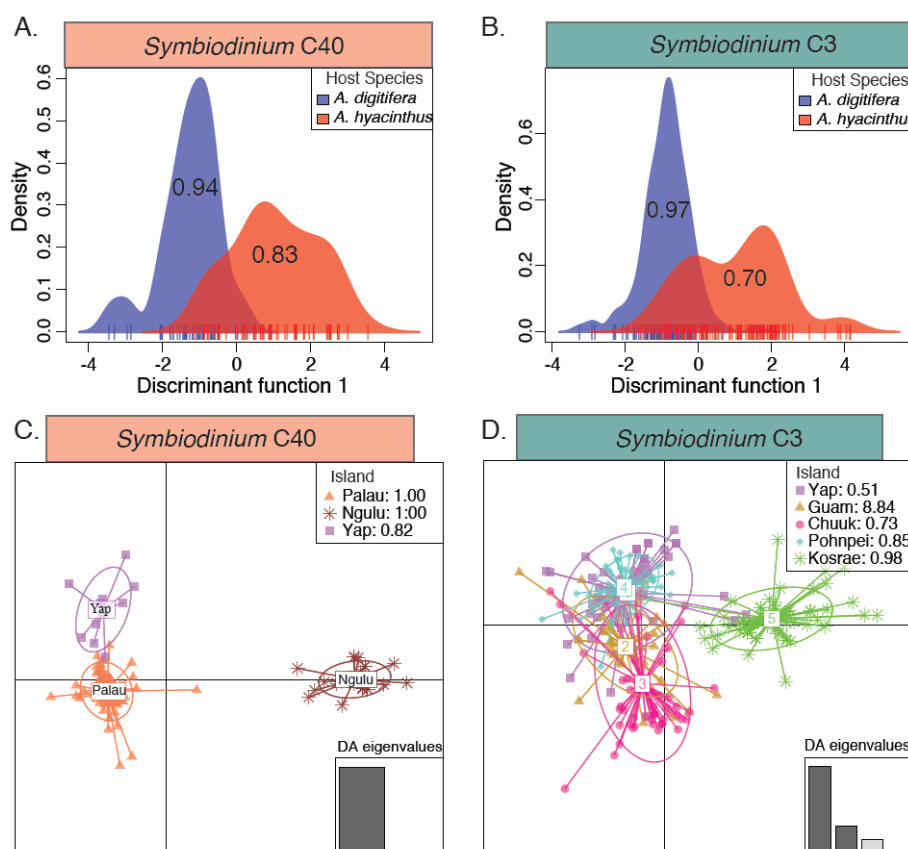

Figure 5: Discriminant analysis of principal components (DAPC) of MLG data for *Symbiodinium* C40 and C3 hosted by *Acropora hyacinthus* and *Acropora digitifera* at thirteen sites across seven islands in Micronesia. A. DAPC analysis on two discriminant functions demonstrating strong host species assignments across all islands for *Symbiodinium* C40 and B. *Symbiodinium* C3. Numbers overlaying the curves indicate successfully assigned fraction of samples. C. DAPC scatter plot for individual samples from *Symbiodinium* C40 represented by colored dots clustered by islands. D. DAPC scatter plot for individual samples from *Symbiodinium* C3 represented by colored dots clustered by islands. Proportions of assignments are indicated in the clusters or in the legends. Information on the DAPC models can be found in Table 3.

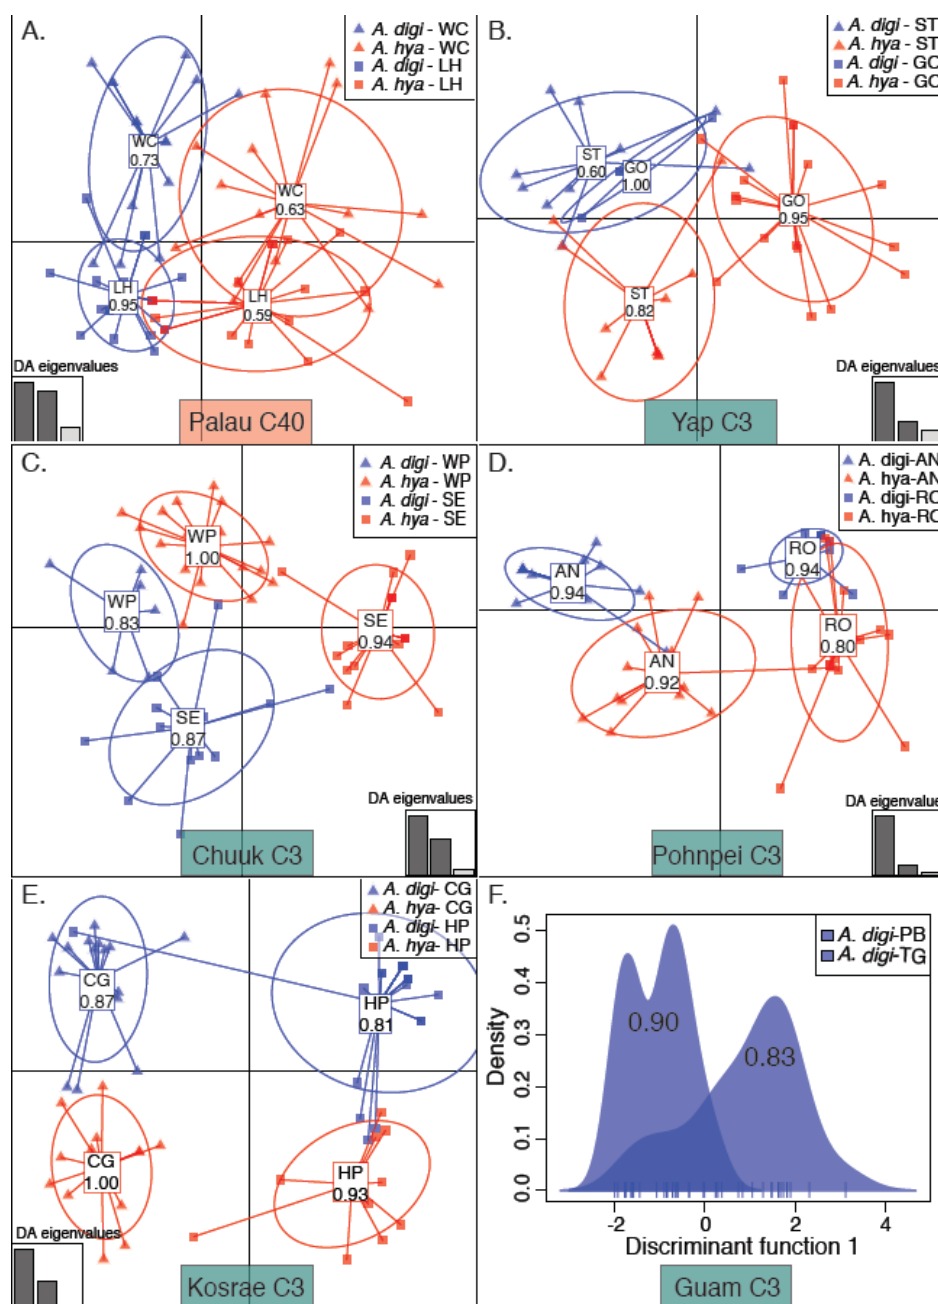

Figure 6: Discriminant analysis of principal components (DAPC) of MLG data for *Symbiodinium* C40 and C3 hosted by *Acropora hyacinthus* and *Acropora digitifera* at twelve sites across six islands (Ngulu not included) in Micronesia. DAPC analysis on two discriminant functions demonstrating host species assignments and site assignments. DAPC scatter plots for individual samples from within A. Palau for *Symbiodinium* C40. B. Yap for *Symbiodinium* C3, C. Chuuk for *Symbiodinium* C3, D. Pohnpei for *Symbiodinium* C3, E. Kosrae for *Symbiodinium* C3, and F. Guam for *Symbiodinium* C3 for *A. digitifera* hosts only (1 DF axis). Proportions of assignments are indicated in the clusters. Information on the DAPC models can be found in Table 3.

## Discussion

### *Promiscuity of the coral host*

Clade C *Symbiodinium* are the dominant symbiont type found in Indo-Pacific reef-building corals (43), presumably because this clade is capable of greater rate of carbon fixation (44) and increased carbon translocation to hosts, which positively influences host fitness (growth) when compared to other clades (44-46). Clade C *Symbiodinium* are considered to be the most derived lineage within the genus *Symbiodinium* and exhibit significantly higher within-clade diversity when compared to other, more basal, clades (14, 47, 48). Across the Micronesian Pacific (Fig. 1), both coral hosts associated exclusively with clade C *Symbiodinium*, which was represented by two distinct lineages—C40 and C3, putatively corresponding to different species (Fig. 2). This observation confirms the first prediction of the ‘global host, local symbiont’ hypothesis: coral hosts show considerable flexibility in their symbiotic association across their range and within their habitat.

### *Lack of dispersal limitation in Symbiodinium across Micronesia*

Initially, we expected to find strong isolation by distance in *Symbiodinium*, since the prevailing view of the *Symbiodinium* life cycle involves symbiotic existence in sedentary hosts alternating with a free-living form that largely exists in the benthos where dispersal by ocean currents must be limited (49-52). In contrast, we observed that genetic differentiation between islands of *Symbiodinium* C3 across Micronesia did not exceed  $F_{ST} = 0.078$ , which contrasts studies from other locations reporting symbiont  $F_{ST}$  as high as 0.54 in clade A (53) and  $\Phi_{ST}$  as high as 0.468 in clade C (54). This lack of physical dispersal limitation is best demonstrated by comparing *Symbiodinium* C3 divergence to

divergence of their coral hosts, which has been shown to nearly perfectly follow biophysical barriers (21). If *Symbiodinium* dispersal were limited by the same physical barriers and to a greater extent, as our hypothesis posited, we would have observed steeper increases in divergence with distance relative to the host; instead, no increase of  $F_{ST}$  with distance was observed (Fig. 4A). Moreover, after correcting for mean heterozygosity, genetic divergence (Jost's D) in *Symbiodinium* C3 was found to be intermediate between *A. hyacinthus* and *A. digitifera* (Fig. 4B), once again demonstrating that symbiont dispersal is less limited than their hosts. This finding contradicts the second prediction of our 'global host, local symbiont' hypothesis and is contrary to our expectations based on earlier  $F_{ST}$ -based reports of stronger *Symbiodinium* differentiation compared to hosts (3, 25, 26, 54).

# *Host specificity*

The majority of reef-building coral species associate with a specific strain (termed "clade" or "subclade") of *Symbiodinium* broadly defined based on mitochondrial and/or chloroplast markers (3, 36, 38, 55). Previous *Symbiodinium* multilocus genotyping studies revealed that each of these strains harbors greater diversity, both in terms of genetic and functional diversity (25, 54, 56). Our data indicate that the local association of hosts and symbionts of the same genotypic cluster is due to pervasive evolution of host specificity in *Symbiodinium* (Fig. 5 & 6). As our study includes two coral species, we also observe that this specificity is not perfect: at every location there were symbionts that would have been assigned to another coral host based on their multilocus genotype (Fig. 6). This suggests that host specialization in *Symbiodinium* arises in the face of

considerable exchange between symbiont communities hosted by different coral species at the same location. However, to which extent this between-host exchange contributes to gene flow is unclear since it remains unknown if *Symbiodinium* undergo sexual reproduction within or outside the host.

### *Environmental partitioning*

The most ecologically relevant postulate of the ‘global host, local symbiont’ hypothesis is that locally available symbionts are also locally adapted, giving rise to a locally adapted holobiont. Recurrent genetic divergence of symbionts between reef sites within the same island (Fig. 6) despite the lack of physical dispersal limitation across much larger distances (Fig. 4) suggests that symbiont genetic divergence is likely due to poor survival of immigrants rather than to physical barriers to migration. Given that hosts are available at every site, this leaves other ecological parameters of local reef environment as the most likely barrier-forming force, preventing survival of immigrants adapted to a different environment— a situation termed “phenotype-environment mismatch” (57). Thus, although our study did not directly test for local adaptation of *Symbiodinium* as per Kawecki and Ebert (58), genetic partitioning of symbionts among different reef environments across small spatial scales suggests that their local adaptation does indeed occur, thereby supporting our hypothesis. Notably, similar to the situation with host specificity, there are several *Symbiodinium* genotypes that appear to be successful migrants between reef sites (particularly clearly visible for Kosrae, Fig. 6E), indicating that environmental partitioning is also incomplete and arises in the face of considerable gene flow.



## Conclusions

Across Micronesia, both coral host species associated with two divergent *Symbiodinium* lineages (putatively corresponding to species), indicating high host promiscuity in symbiont association. In contrast, within each *Symbiodinium* lineage, strong associations with particular host species were observed, suggesting that host-specificity is an important driver of *Symbiodinium* diversification. Unexpectedly, *Symbiodinium* genetic divergence did not correlate with physical distance between islands, contrary to our initial prediction that symbionts would exhibit a more pronounced isolation-by-distance pattern than their hosts due to stronger barriers to dispersal. Instead, *Symbiodinium* genetic structure was driven by the combined effects of local (within-island) environment and host identity, suggesting that *Symbiodinium* assemblages across Micronesia are comprised by broadly dispersing lineages dynamically adapting to specific coral hosts and reef environments across their range. Notably, this pattern perfectly follows Baas Becking's hypothesis for microbial communities: "Everything is everywhere, but the environment selects" (59), assuming that host species themselves contribute to this 'environment'. Although this observation contradicts the original formulation of our 'global host, local symbiont' hypothesis, it supports the view that coral hosts could derive fitness benefits from associating with locally available *Symbiodinium*. Finally, dramatic differences in factors that structure genetic diversity in the coral host and their algal symbionts render the "hologenome" concept irrelevant to horizontally-transmitting coral-algal symbioses.

## Materials and Methods

**Sampling Locations and Methodology:** This study comprised a subset of samples previously analyzed for coral host genetics in Davies *et al.* (21) (Table 5, Fig. 1). Twenty-five individuals of each coral host species (*Acropora hyacinthus* and *A. digitifera*) were examined at two reef sites within seven islands, with the exception of Ngulu (the only species collected was *A. hyacinthus*) and Guam (no *A. hyacinthus* were found and only *A. digitifera* were collected), for a total of thirteen sites.

Table 5. Reef Site Collections. GPS coordinates, main island group, number of *A. digitifera* and *A. hyacinthus* hosts genotyped. The numbers in brackets are individuals hosting a single *Symbiodinium* MLG, which were included in all analyses presented here. Site letter corresponds to island insets in Figure 1.

| Site                  | Island      | GPS                         | <i>A. digitifera</i> | <i>A. hyacinthus</i> |
|-----------------------|-------------|-----------------------------|----------------------|----------------------|
| WC. West Channel Reef | Palau       | 7°31'55.7 N, 134°29'42.8 E  | 24 (20)              | 25 (17)              |
| LH. Lighthouse Reef   | Palau       | 7°16'62.4 N, 134°27'61.9 E  | 23 (15)              | 24 (16)              |
| NG. Ngulu             | Ngulu Atoll | 8°18'12.0 N, 137°29'18.7 E  | 0 <sup>1</sup>       | 39 (25)              |
| ST. South Tip Reef    | Yap         | 9°26'05.4 N, 138°02'10.4 E  | 25 (10)              | 25 (11)              |
| GO. Goofnuw Channel   | Yap         | 9°34'26.4 N, 138°12'19.2 E  | 24 (15) <sup>m</sup> | 25 (20)              |
| PB. Pago Bay          | Guam        | 13°25'66.6 N, 144°47'94.3 E | 26 (20)              | 0*                   |
| TG. Tanguisson        | Guam        | 13°32'61.1 N, 144°48'52.6 E | 21 (17)              | 0*                   |
| WP. West Polle        | Chuuk       | 7°19'69.7 N, 151°33'21.1 E  | 15 (6) <sup>m</sup>  | 24 (18)              |
| SE. South East Pass   | Chuuk       | 7°14'60.3 N, 152°01'29.1 E  | 21 (17) <sup>m</sup> | 22 (16)              |
| AN. Ant Atoll (East)  | Pohnpei     | 6°47'42.3 N, 158°01'20.7 E  | 24 (16)              | 22 (13)              |
| RO. Roj               | Pohnpei     | 6°46'37.7 N, 158°12'24.1 E  | 24 (16)              | 23 (15)              |
| CG. Coral Garden      | Kosrae      | 5°18'47.2 N, 162°53'01.8 E  | 25 (15) <sup>m</sup> | 24 (13)              |
| HP. Hiroshi Point     | Kosrae      | 5°15'88.0 N, 162°59'01.8 E  | 25 (23) <sup>m</sup> | 25 (14)              |
| TOTAL                 |             |                             | <b>277 (190)</b>     | <b>278 (178)</b>     |

\* indicates that no individuals of this species were found

<sup>1</sup> indicates that individuals were not collected from this site but are likely present

<sup>m</sup> indicated sites where multiple *Symbiodinium* species were detected

**Laboratory Procedures:** Holobiont DNA was isolated following Davies *et al.* (60). Microsatellite primers for this study consisted of six previously published clade C loci (61, 62) and one novel locus mined using Msatcommander (63) from nucleotide EST data for *Symbiodinium* sp. clade C3 in GenBank (64) (Table 6). Loci were multiplexed according to annealing temperatures and fragment sizes. Each 20 µl polymerase chain

reaction (PCR) mixture contained 10 ng of DNA template, 0.1  $\mu$ M of each forward primer, 0.1  $\mu$ M of each reverse primer, 0.2 mM dNTP, 1  $\mu$ l 10X *ExTaq* buffer, 0.025 U *ExTaq* Polymerase (Takara Biotechnology) and 0.0125 U *Pfu* Polymerase (Agilent Technologies). Amplifications were performed using a DNA Engine Tetrad2 Thermal Cycler (Bio-Rad, Hercules CA). Cycling began at 94°C for 5 min, followed by 35 cycles of 94°C for 40 s, annealing temperature for 120 s, and 72°C for 60 s and a 10 minute extension period at 72°C. Molecular weights were analyzed using the ABI 3130XL capillary sequencer with an in-house ROX-labeled size standard. Data were binned by repeat size and individuals failing to amplify at  $\geq 3$  loci were excluded from analyses.

Table 6: Summary of six polymorphic microsatellite loci used to assess genetic variation *Symbiodinium* clade C hosted by *A. hyacinthus* and *A. digitifera* and their corresponding multiplexing groups.

| Multiplex Group | Locus (Repeat)   | Primer Sequence 5'-3'                                   | Repeat  | Annealing Temperature | Source            |
|-----------------|------------------|---------------------------------------------------------|---------|-----------------------|-------------------|
| A               | <i>SgrSpl_30</i> | F: FAM-ccgaactaccttggtaac<br>R: aaaagacaaggacatctcgg    | TA      | 53                    | Wham et al., 2014 |
| B               | <i>SgrSpl_78</i> | F: FAM-tgaaattcggtgttcattgt<br>R:ctcagatgtttccgacgagt   | TA      | 54                    | Wham et al., 2014 |
|                 | <i>Sgr_21</i>    | F: HEX-tgctgagtggcgtgtatc<br>R: tgatggtacttgatggtg      | TCA     | 54                    | Wham et al., 2014 |
|                 | <i>Spl_33</i>    | F: HEX-acttgcaaaagccaagatcg<br>R: gaacggtgaaaggaaaatga  | CAT     | 54                    | Wham et al., 2014 |
| C               | <i>C784</i>      | F: Hadp-ctccttaggactggactcgc<br>R: agaagtcaaatcgaccatcg | ATC     | 60                    | This Study        |
| D               | <i>C105</i>      | F: FAM-tttcgttggtgacattgtatg<br>R: ggactgaaaggtgcttgagg | complex | 55                    | Bay et al., 2009  |

Fadp- labeled primers were indirectly labeled in each PCR reaction with an additional FAM labeled adapter tag sequence: FAM: agcagcgaactcagtacaaca  
Hadv- labeled primers were indirectly labeled in each PCR reaction with an additional FAM labeled adapter tag sequence: HEX: tcgtcgttgagtcacgtta

**Data Analysis:** *Symbiodinium* in clade C microsatellite data were scored as diploid based on available information on the ploidy of these organisms (3, 62, 65). Since each individual host could potentially contain a population of genetically distinct *Symbiodinium* individuals, multi-locus genotypes (MLG) were only considered in this study if they contained two or fewer alleles across all loci, suggesting that all alleles originate from a single, clonally replicated, genome (65), which was the case for a total of 190 out of 277 for *A. digitifera* hosts and 178 out of 278 for *A. hyacinthus* hosts. We first applied a Bayesian approach implemented in STRUCTURE v2.3.3 (66). STRUCTURE uses a Monte Carlo Markov chain (MCMC) clustering algorithm to assign individuals with similar genotypes to populations. Mean and variance of log likelihood values of the number of populations K (1-10) were inferred by STRUCTURE with  $10^6$  iterations (burn in = 300,000 iterations) in ten replicate runs for each K. An admixture model was implemented with no location prior. Following the recommendations of (67), the ad hoc statistic  $\Delta K$  was calculated based on the rate of change of the log-likelihood between consecutive K values, which is implemented in the program STRUCTURE Harvester (68). CLUMPP (69) and DISTRICT (70) were used to produce graphics. We observed high percent assignment to two different clusters among sympatric individuals. Following the methodology of Wham and LaJeunesse (65), we investigated the relationship between these cluster assignments and allele identities. From this analysis we found a strong relationship between cluster assignments and allele identity, particularly at Sgr\_21 and Spl\_33 (Supplement Fig. S1A, B), and it became clear that two distinct *Symbiodinium* lineages were present. MLG data were then split into *Symbiodinium* lineages based on the probability of species assignment conditioned on their cluster assignment (65).

Additional STRUCTURE runs were completed following descriptions above with these subsequent differences: 1) location prior was implemented and 2) instead of using the  $\Delta K$  statistic, we presented the K that maximized the mean of the estimated probability of data while minimizing the standard deviation.

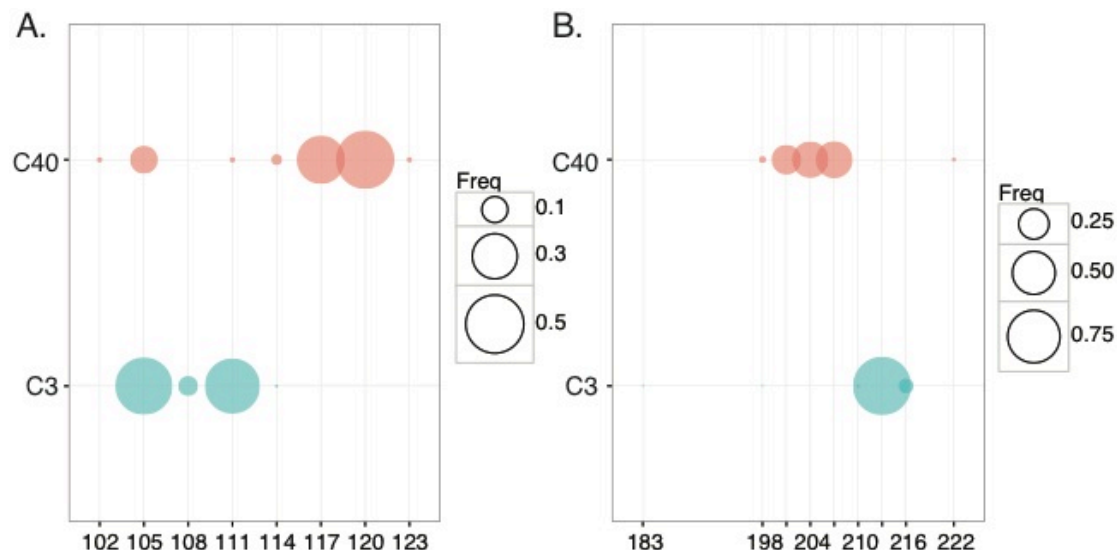

Supplementary Figure 1: Bubble plot of the SSR allele frequencies of C3 (red) and C40 (blue) at the two loci that showed the largest discrimination power, Sgr\_21 (A) and Spl\_33 (B). The size of each bubble is proportional to the allele frequency within each *Symbiodinium* type.

Once data were partitioned by *Symbiodinium* lineages, genetic divergences among islands and sites were investigated using  $F_{ST}$  (AMOVA, 9999 permutations in GENALEX v6.5, (71)). Pairwise differentiations ( $F_{ST}$  and Jost's D) and pairwise island distances were then correlated to test for isolation by distance (IBD) in *Symbiodinium* C3 (not sufficient data for C40) and these IBD trends were compared to results from the host species (72). Mean allelic diversities per island and numbers of private alleles per island were also calculated in GENALEX v6.5.

To resolve differences between islands, between host species and between sites and host species within each island, assignment of samples to genetic clusters using

discriminant analysis of principal components (DAPC) was performed in R (73) using the ADEGENET package (74, 75). Here, *Symbiodinium* data were converted into principle components and then a-scores were used to determine trade-offs between power of discrimination and model over-fitting. Relationships were examined by DAPC, which optimizes variation among clusters by minimizing variation within clusters, while retaining the optimal number of principle components and maximum number of discriminant functions. All information on DAPC model parameters and results are contained in Table 3. Cluster assignment patterns were compared across islands, host species, and among host species and sites within each island.

#### **Sequencing Analysis of *Symbiodinium* psbA<sup>ncr</sup>**

In order to confirm the assignments of individuals to different *Symbiodinium* lineages, we selected a small subset of the full sample set and analyzed the non-coding region of the circular plastid (psbA<sup>ncr</sup>). We amplified the psbA<sup>ncr</sup> locus with the primers 7.4-Forw and 7.8-Rev following the methods described by LaJeunesse and Thornhill (40). The amplified product was directly sequenced and the resulting sequences were aligned with ClustalW2 (<http://www.ebi.ac.uk/Tools/msa/clustalw2/>) to clade C psbA<sup>ncr</sup> sequences from common *Symbiodinium* types found throughout the Indo-Pacific region (Supplemental Table 1: JQ043587-JQ043676 from (40)). We reconstructed the phylogeny of these samples using the default settings of Phylogeny.fr (76). The identities of *Symbiodinium* types from our analysis were interpreted from their percent sequence identity with these previously identified *Symbiodinium* types and their position on the resulting phylogeny.

# **Acknowledgements**

Thanks to field assistants Carly Kenkel, Tim Kiett, Irina Yakushenok and David Stump. Nida Zehra Khawaja Rahman was integral in the molecular work and James Derry helped with data management. We are grateful to Ulrich Mueller for numerous comments and suggestions. We also acknowledge all permit authorities. This study was supported by the grant from the Coral Reef Conservation program of the National Oceanic and Atmospheric Administration (administered through the Hawaiian Undersea Research Laboratory) and the National Science Foundation grant DEB-1054766 to M.V.M. DW was funded in part by Pennsylvania State University and grants from the National Science Foundation (OCE-0928764 and IOS-1258058).

## References

1. Brucker RM & Bordenstein SR (2012) The roles of host evolutionary relationships (genus: *Nasonia*) and development in structuring microbial communities. *Evolution* 66(2):349-362.
2. Moran NA (2006) Symbiosis. *Curr Biol* 16(20):R866-871.
3. Thornhill DJ, Lewis AM, Wham DC, & LaJeunesse TC (2014) Host-specialist lineages dominate the adaptive radiation of reef coral endosymbionts. *Evolution* 68(2):352-367.
4. Brucker RM & Bordenstein SR (2012) Speciation by symbiosis. *Trends Ecol Evol* 27(8):443-451.
5. Mereschkowsky K (1910) Theorie der zwei Plasmaarten als Grundlage der Symbiogenesis, einer neuen Lehre von der Entstehung der Organismen. *Biol Centralbl* 30:353-367.
6. Nakabachi A, Ishida K, Hongoh Y, Ohkuma M, & Miyagishima SY (2014) Aphid gene of bacterial origin encodes a protein transported to an obligate endosymbiont. *Curr Biol* 24(14):R640-641.
7. Shigenobu S & Wilson AC (2011) Genomic revelations of a mutualism: the pea aphid and its obligate bacterial symbiont. *Cellular and molecular life sciences : CMLS* 68(8):1297-1309.
8. Peksa O & Skaloud P (2011) Do photobionts influence the ecology of lichens? A case study of environmental preferences in symbiotic green alga *Asterochloris* (Trebouxiophyceae). *Mol Ecol* 20(18):3936-3948.
9. Fernandez-Mendoza F, et al. (2011) Population structure of mycobionts and photobionts of the widespread lichen *Cetraria aculeata*. *Mol Ecol* 20(6):1208-1232.
10. Henry LM, et al. (2013) Horizontally transmitted symbionts and host colonization of ecological niches. *Curr Biol* 23(17):1713-1717.
11. Brucker RM & Bordenstein SR (2014) Response to Comment on "The hologenomic basis of speciation: Gut bacteria cause hybrid lethality in the genus *Nasonia*". *Science* 345(6200).
12. Zilber-Rosenberg I & Rosenberg E (2008) Role of microorganisms in the evolution of animals and plants: the hologenome theory of evolution. *Fems Microbiol Rev* 32(5):723-735.
13. Moran NA & Sloan DB (2015) The Hologenome Concept: Helpful or Hollow? *PLoS biology* 13(12):e1002311.
14. Lesser MP, Stat M, & Gates RD (2013) The endosymbiotic dinoflagellates (*Symbiodinium* sp.) of corals are parasites and mutualists. *Coral Reefs*:603-611.
15. Muscatine L (1990) The role of symbiotic algae in carbon and energy flux in reef corals. *Ecosystems of the World* 25:75-87.
16. Barott KL, Venn AA, Perez SO, Tambutte S, & Tresguerres M (2015) Coral host cells acidify symbiotic algal microenvironment to promote photosynthesis. *Proc Natl Acad Sci U S A* 112(2):607-612.



- 500 17. Muscatine L & Cernichiaro E (1969) Assimilation of photosynthetic products  
501 of zooxanthellae by a reef coral. *The Biological Bulletin* 137(3):506-523.
- 502 18. Trench RK & Blank RJ (1987) *Symbiodinium microadriaticum* Fredenthal, S.  
503 Goreau sp. nov., *S. Kawagutii* sp. nov., and *S. pilosum* sp. nov.: Gymnodinoid  
504 dinoflagellate symbionts of marine invertebrates. *J Phycol* 23(3):469-481.
- 505 19. Fadlallah YH (1983) Sexual reproduction, development and larval biology of  
506 scleractinian corals. A review. *Coral Reefs* 2:129-150.
- 507 20. Harrison PLW, C.C. (1990) *Reproduction, dispersal and recruitment of*  
508 *scleractinian corals* (elsevier Science Publications Amsterdam).
- 509 21. Davies SW, Trembl EA, Kenkel CD, & Matz MV (2015) Exploring the role of  
510 Micronesian islands in the maintenance of coral genetic diversity in the  
511 Pacific Ocean. *Mol Ecol* 24(1):70-82.
- 512 22. Gorospe KD & Karl SA (2011) Small-Scale Spatial Analysis of In Situ Sea  
513 Temperature throughout a Single Coral Patch Reef. *Journal of Marine Biology*  
514 2011:12.
- 515 23. Byler KA, Carmi-Veal M, Fine M, & Goulet TL (2013) Multiple symbiont  
516 acquisition strategies as an adaptive mechanism in the coral *Stylophora*  
517 *pistillata*. *Plos One* 8(3):e59596.
- 518 24. Rowan R & Knowlton N (1995) Intraspecific diversity and ecological  
519 zonation in coral-algal symbiosis. *Proc Natl Acad Sci U S A* 92(7):2850-2853.
- 520 25. Howells EJ, *et al.* (2012) Coral thermal tolerance shaped by local adaptation  
521 of photosymbionts. *Nat Clim Change* 2:116-120.
- 522 26. Baums IB, Devlin-Durante MK, & LaJeunesse TC (2014) New insights into the  
523 dynamics between reef corals and their associated dinoflagellate  
524 endosymbionts from population genetic studies. *Mol Ecol* 23(17):4203-4215.
- 525 27. Abrego D, MJ VANO, & Willis BL (2009) Highly infectious symbiont  
526 dominates initial uptake in coral juveniles. *Mol Ecol* 18(16):3518-3531.
- 527 28. Gómez-Cabrera MdC, Ortiz JC, Loh WKW, Ward S, & Hoegh-Guldberg O  
528 (2008) Acquisition of symbiotic dinoflagellates (*Symbiodinium*) by juveniles  
529 of the coral *Acropora longicyathus*. *Coral Reefs* 27(1):219-226.
- 530 29. Little AF, van Oppen MJ, & Willis BL (2004) Flexibility in algal endosymbioses  
531 shapes growth in reef corals. *Science* 304(5676):1492-1494.
- 532 30. Abrego D, van Oppen MJ, & Willis B (2009) Onset of algal endosymbiont  
533 specificity varies among closely related species of *Acropora* corals during  
534 early ontogeny. *Mol Ecol* 18(16):3532-3543.
- 535 31. Ackerly DD, Schilck DW, & Webb CO (2006) Niche evolution and adaptive  
536 radiation: testing the order of trait divergence. *Ecology* 87(7 Suppl):S50-61.
- 537 32. Coffroth MA, Santos SR, & Goulet TL (2001) Early ontogenetic expression of  
538 specificity in a cnidarian-algal symbiosis. *Mar Ecol Prog Ser* 222:85-96.
- 539 33. Finney JC, *et al.* (2010) The relative significance of host-habitat, depth, and  
540 geography on the ecology, endemism, and speciation of coral endosymbionts  
541 in the genus *Symbiodinium*. *Microbial ecology* 60(1):250-263.
- 542 34. LaJeunesse TC (2005) "Species" radiations of symbiotic dinoflagellates in the  
543 Atlantic and Indo-Pacific since the Miocene-Pliocene transition. *Mol Biol Evol*  
544 22(3):570-581.

- 545 35. LaJeunesse TC, *et al.* (2010) Host-symbiont recombination versus natural  
546 selection in the response of coral-dinoflagellate symbioses to environmental  
547 disturbance. *Proceedings. Biological sciences / The Royal Society*  
548 277(1696):2925-2934.
- 549 36. Rodriguez-Lanetty M, Krupp DA, & Weis VM (2004) Distinct ITS types of  
550 Symbiodinium in Clade C correlate with cnidarian/dinoflagellate specificity  
551 during onset of symbiosis. *Mar Ecol Prog Ser* 275(97-102).
- 552 37. Thornhill DJ, Xiang Y, Fitt WK, & Santos SR (2009) Reef endemism, host  
553 specificity and temporal stability in populations of symbiotic dinoflagellates  
554 from two ecologically dominant Caribbean corals. *Plos One* 4(7):e6262.
- 555 38. Weis VM, Reynolds WS, deBoer MD, & Krupp DA (2001) Host-symbiont  
556 specificity during onset of symbiosis between the dinoflagellates  
557 Symbiodinium spp. and planula larvae of the scleractinian coral *Fungia*  
558 *scutaria*. *Coral Reefs* 20(3):301-308.
- 559 39. Polato NR, Vera JC, & Baums IB (2011) Gene discovery in the threatened  
560 elkhorn coral: 454 sequencing of the *Acropora palmata* transcriptome. *Plos*  
561 *One* 6(12):e28634.
- 562 40. LaJeunesse TC & Thornhill DJ (2011) Improved resolution of reef-coral  
563 endosymbiont (Symbiodinium) species diversity, ecology, and evolution  
564 through psbA non-coding region genotyping. *Plos One* 6(12):e29013.
- 565 41. Jakobsson M, Edge MD, & Rosenberg NA (2013) The Relationship Between F-  
566 ST and the Frequency of the Most Frequent Allele. *Genetics* 193(2):515-528.
- 567 42. Jost L (2008) G(ST) and its relatives do not measure differentiation. *Mol Ecol*  
568 17(18):4015-4026.
- 569 43. Quigley KM, *et al.* (2014) Deep-Sequencing Method for Quantifying  
570 Background Abundances of Symbiodinium Types: Exploring the Rare  
571 Symbiodinium Biosphere in Reef-Building Corals. *Plos One* 9(4).
- 572 44. Stat M, Morris E, & Gates RD (2008) Functional diversity in coral-  
573 dinoflagellate symbiosis. *Proc Natl Acad Sci U S A* 105(27):9256-9261.
- 574 45. Jones A & Berkelmans R (2010) Potential costs of acclimatization to a  
575 warmer climate: growth of a reef coral with heat tolerant vs. sensitive  
576 symbiont types. *Plos One* 5(5):e10437.
- 577 46. Mieog JC, *et al.* (2009) The roles and interactions of symbiont, host and  
578 environment in defining coral fitness. *Plos One* 4(7):e6364.
- 579 47. Pochon X & Gates RD (2010) A new Symbiodinium clade (Dinophyceae) from  
580 soritid foraminifera in Hawai'i. *Molecular phylogenetics and evolution*  
581 56(1):492-497.
- 582 48. Pochon X, Montoya-Burgos JI, Stadelmann B, & Pawlowski J (2006) Molecular  
583 phylogeny, evolutionary rates, and divergence timing of the symbiotic  
584 dinoflagellate genus Symbiodinium. *Molecular phylogenetics and evolution*  
585 38(1):20-30.
- 586 49. Fitt WK, Chang SS, & Trench RK (1981) Motility Patterns of Different Strains  
587 of the Symbiotic Dinoflagellate Symbiodinium (=Gymnodinium)  
588 Microadriaticum (Freudenthal) in Culture. *Bulletin of Marine Science*  
589 31(2):436-443.

- 590 50. Fitt WK & Trench RK (1983) The Relation of Diel Patterns of Cell-Division to  
591 Diel Patterns of Motility in the Symbiotic Dinoflagellate Symbiodinium-  
592 Microadriaticum Freudenthal in Culture. *New Phytol* 94(3):421-432.
- 593 51. Yacobovitch T, Benayahu Y, & Weis VM (2004) Motility of zooxanthellae  
594 isolated from the Red Sea soft coral *Heteroxenia fuscescens* (Cnidaria). *J Exp*  
595 *Mar Biol Ecol* 298(1):35-48.
- 596 52. Littman RA, van Oppen MJH, & Willis BL (2008) Methods for sampling free-  
597 living Symbiodinium (zooxanthellae) and their distribution and abundance at  
598 Lizard Island (Great Barrier Reef). *J Exp Mar Biol Ecol* 364(1):48-53.
- 599 53. Andras JP, Kirk NL, & Harvell CD (2011) Range-wide population genetic  
600 structure of Symbiodinium associated with the Caribbean Sea fan coral,  
601 *Gorgonia ventalina*. *Mol Ecol* 20(12):2525-2542.
- 602 54. Howells EJ, van Oppen MJ, & Bay LK (2009) High genetic differentiation and  
603 cross-shelf patterns of genetic diversity among Great Barrier Reef  
604 populations of Symbiodinium. *Coral Reefs* 28(1):215-225.
- 605 55. Fabina NS, Putnam HM, Franklin EC, Stat M, & Gates RD (2013) Symbiotic  
606 specificity, association patterns, and function determine community  
607 responses to global changes: defining critical research areas for coral-  
608 Symbiodinium symbioses. *Global Change Biol* 19(11):3306-3316.
- 609 56. Santos SR, Shearer TL, Hannes AR, & Coffroth MA (2004) Fine-scale diversity  
610 and specificity in the most prevalent lineage of symbiotic dinoflagellates  
611 (Symbiodinium, Dinophyceae) of the Caribbean. *Mol Ecol* 13(2):459-469.
- 612 57. Marshall DJ, Monro K, Bode M, Keough MJ, & Swearer S (2010) Phenotype-  
613 environment mismatches reduce connectivity in the sea. *Ecol Lett* 13(1):128-  
614 140.
- 615 58. Kawecki TJ & Ebert D (2004) Conceptual issues in local adaptation. *Ecol Lett*  
616 7(12):1225-1241.
- 617 59. Baas Becking LGM (1934) Geobiologie of inleiding tot de milieukunde. *Den*  
618 *Haag [Netherlands]: W.P. Van Stockum & Zoon, N. V.*
- 619 60. Davies SW, *et al.* (2013) Novel polymorphic microsatellite markers for  
620 population genetics of the endangered Caribbean star coral, *Montastraea*  
621 *faveolata*. *Mar Biodivers* 43(2):167-172.
- 622 61. Bay LK, Howells EJ, & van Oppen MJ (2009) Isolation, characterisation and  
623 cross amplification of thirteen microsatellite loci for coral endo-symbiotic  
624 dinoflagellates (Symbiodinium clade C). *Conserv Genet Resour* 1(1):199-203.
- 625 62. Wham DC, Carmichael M, & LaJeunesse TC (2014) Microsatellite loci for  
626 Symbiodinium goreau and other Clade C Symbiodinium. *Conserv Genet*  
627 *Resour* 6(1):127-129.
- 628 63. Faircloth BC (2008) MSATCOMMANDER: detection of microsatellite repeat  
629 arrays and automated, locus-specific primer design. *Molecular ecology*  
630 *resources* 8(1):92-94.
- 631 64. Leggat W, Hoegh-Guldberg O, Dove S, & Yellowlees D (2007) Analysis of an  
632 EST library from the dinoflagellate (Symbiodinium sp.) symbiont of reef-  
633 building corals. *J Phycol* 43(5):1010-1021.

65. Traylor-Knowles N, *et al.* (2011) Production of a reference transcriptome and transcriptomic database (PocilloporaBase) for the cauliflower coral, *Pocillopora damicornis*. *BMC genomics* 12:585.
66. Pritchard JK, Stephens M, & Donnelly P (2000) Inference of population structure using multilocus genotype data. *Genetics* 155(2):945-959.
67. Evanno G, Regnaut S, & Goudet J (2005) Detecting the number of clusters of individuals using the software STRUCTURE: a simulation study. *Mol Ecol* 14(8):2611-2620.
68. Earl DA & Vonholdt BM (2012) STRUCTURE HARVESTER: a website and program for visualizing STRUCTURE output and implementing the Evanno method. *Conserv Genet Resour* 4(2):359-361.
69. Jakobsson M & Rosenberg NA (2007) CLUMPP: a cluster matching and permutation program for dealing with label switching and multimodality in analysis of population structure. *Bioinformatics* 23(14):1801-1806.
70. Rosenberg NA (2004) DISTRUCT: a program for the graphical display of population structure. *Mol Ecol Notes* 4(1):137-138.
71. Peakall R & Smouse PE (2006) GENALEX 6: genetic analysis in Excel. Population genetic software for teaching and research. *Mol Ecol Notes* 6(1):288-295.
72. Davies SW, Treml EA, Kenkel CD, & Matz MV (2015) Exploring the role of Micronesian islands in the maintenance of coral genetic diversity in the Pacific Ocean. *Mol Ecol* 24(1):70-82.
73. R Development Core Team (2015) R: A language and environment for statistical computing. (R Foundation for Statistical Computing, Vienna, Austria).
74. Jombart T (2008) adegenet: a R package for the multivariate analysis of genetic markers. *Bioinformatics* 24(11):1403-1405.
75. Jombart T, Devillard S, & Balloux F (2010) Discriminant analysis of principal components: a new method for the analysis of genetically structured populations. *BMC genetics* 11:94.
76. Dereeper A, *et al.* (2008) Phylogeny.fr: robust phylogenetic analysis for the non-specialist. *Nucleic Acids Res* 36(Web Server issue):W465-469.

Supplemental Table 1: Accession number and corresponding Clade C *Symbiodinium* lineage for each unique sequence identifier from Figure 2.

| Sequence ID | Accession Number | Lineage |
|-------------|------------------|---------|
| 1           | JQ043642         | C3      |
| 2           | KF572372         | C3      |
| 3           | JQ043643         | C3      |
| 4           | JQ043641         | C3      |
| 5           | JQ043640         | C3      |
| 6           | JQ043644         | C3      |
| 7           | JQ043635         | C3      |
| 8           | JQ043638         | C3      |
| 9           | JQ043637         | C3      |
| 10          | JQ043636         | C3      |
| 11          | KF572331         | C3      |
| 12          | KF572332         | C3      |
| 13          | KF572318         | C3      |
| 14          | KF572319         | C3      |
| 15          | KF572373         | C3      |
| 16          | KF572374         | C3      |
| 17          | KF572358         | C3      |
| 18          | KF572368         | C40     |
| 19          | KF572359         | C40     |
| 20          | KF572367         | C40     |
| 21          | KF572366         | C40     |
| 22          | KF572360         | C40     |
| 23          | KF572357         | C40     |
| 24          | KF572363         | C40     |
| 25          | KF572365         | C40     |
| 26          | KF572364         | C40     |
| 27          | KF572370         | C40     |
| 28          | JQ043603         | C31     |
| 29          | JQ043599         | C31     |
| 30          | JQ043604         | C31     |
| 31          | JQ043671         | C27     |
| 32          | JQ043673         | C27     |
| 33          | JQ043670         | C27     |
| 34          | JQ043669         | C27     |
| 35          | JQ043676         | C27     |
